# Supplementary material for: Concise synthesis of (±)-horsfiline and (±)-coerulescine by tandem cyclisation of iodoaryl alkenyl azides
Source: Royal Society of Chemistry journal article supplement (doi:10.1039/b208114h), 2002-12-19
Supplement: b208114h.doc [file b208114h.doc]

**Reduction of 3-[benzyl-(2-iodo-4-methoxyphenyl)carbamoyl]but-3-enoic acid methyl ester 15a using DIBAL-H**

Diisobutylaluminum hydride [13.54 cm-3, 13.54 mmol, 2.10 equiv, (1M in tol.)] was added dropwise to a solution of 3-[benzyl-(2-iodo-4-methoxyphenyl)carbamoyl]but-3-enoic acid methyl ester 15a (3.0 g, 6.45 mmol, 1.00 equiv.) in dry toluene (70 cm-3) at -78°C. The mixture was stirred at 0°C for 2 h, and then warmed to 0°C and hydrochloric acid (2M, 30 cm-3) added carefully. The reaction was stirred for a further 15 min and the aqueous layer separated and extracted with diethyl ether. The ether layer was washed with brine and then dried over anhydrous sodium sulfate. Removal of the solvent *in vacuo* followed by column chromatography on silica gel eluting petroleum ether: ethyl acetate 2:1 yielded a mixture of two compounds. From the 1H-NMR it was identified that in both compounds the ester group had been reduced. Also one of the compounds had a terminal alkene and the other had a CH3 which appeared as a doublet. From the last observations it is proposed that the two compounds were *N-Benzyl-2-(2-hydroxyethyl)-N-(2-iodo-4-methoxyphenyl)acrylamide* 16a and *N-Benzyl-4-hydroxy-N-(2-iodo-4-methoxy-phenyl)-2-methyl-butyramide* 18, which could not be separated.

Attempted addition of Sodium Phenylselenide to 3-[benzyl-(2-iodo-4-methoxyphenyl)carbamoyl]-but-3-enoic acid methyl ester 15a

Sodium borohydride (0.3 g, 7.82 mmol, 1.30 equiv.) was added under nitrogen in batches to a mixture of diphenyl diselenide in dry ethanol (15 cm-3) with stirring at r.t. (Caution! Reduction of the diselenide is exothermic and vigorous hydrogen evolution occurs). The faint yellow solution of sodium benzeneselenolate obtained was cooled to 0ºC, then acetic acid (0.8 cm-3, 13.85 mmol, 2.30 equiv.) was added. A solution of 3-[benzyl-(2-iodo-4-methoxyphenyl)carbamoyl]but-3-enoic acid methyl ester **15a** (2.80 g, 6.02 mmol, 1.00 equiv.) in dry ethanol (3 cm-3) was added and the resulting mixture was stirred at 0ºC for an additional 4 h. The mixture was poured into water (120 cm-3), extracted with diethyl ether (180 cm-3), and the extract was washed with water and brine. At the end of the reaction only the starting material was recovered.

*N*-Benzyl-*N*-(2-iodo-4-methoxyphenyl)-3-phenylsulfanylmethylsuccinamic acid

methyl ester 19

Thiophenol (12.42 cm-3, 121.00 mmol, 25.00 equiv.) was added to a solution of DBU (1.08 cm-3, 7.25 mmol, 1.50 equiv.) in dry THF (230 cm-3) under nitrogen at ambient temperature. 3-[Benzyl-(2-iodo-4-methoxyphenyl)carbamoyl]but-3-enoic acid methyl ester **15a** (2.25 g, 4.84 mmol, 1.00 equiv.) dissolved in dry THF (60 cm-3) was added by cannula and the reaction mixture was heated under reflux for 16 h. The mixture was cooled and concentrated under reduced pressure. Column chromatography using petroleum ether: ethyl acetate 7:1 afforded pure *N-benzyl-N-(2-iodo-4-methoxyphenyl)-3- phenylsulfanylmethylsuccinamic acid methyl ester* **19** as a white solid (2.67 g, 96%); m.p. 109-112ºC; Found: C, 54.13; H, 4.65; N, 2.44. C26H26INO4S requires C, 54.25; H, 4.56; N, 2.44; [Found: (ES) MH+ 576.0710, C26H27INO4S requires *MH* 576.0705]; **max (film)/cm-1 3061, 3004, 2950, 2838, 1732, 1652, 1591, 1488, 1438, 1287, 1208; **H 2.66-2.75 and 2.87-2.94 (1H, m, CH), 2.97-3.04 (2H, m, CH2), 3.15-3.27 (2H, m, CH2), 3.63 and 3.88 (3H, 2 x s, CH3), 3.68 and 3.69 (3H, 2 x s, CH3), 3.93 and 3.96 (1H, 2 x d, *J* 14.3, CH2), 5.74 and 5.78 (1H, 2 x d, *J* 14.3, CH2), 6.16 and 6.61 (1H, 2 x dd, *J* 2.8, 8.7, ArH), 6.36 and 6.92 (1H, 2 x d, *J* 8.7, ArH), 7.04–7.28 (10H, m, ArH), 7.33 (1H, d, *J* 2.8, ArH); **C 34.5 (t), 36.0 (t), 36.8 (t), 38.2 (d), 38.4 (d), 51.7 (d), 52.0 (d), 52.2 (t), 52.3 (t), 55.7 (q), 99.4 (s), 99.6 (s), 114.0 (d), 114.4 (d), 125.2 (d), 125.4 (d), 126.6 (d), 127.5 (d), 127.6 (d), 128.4 (d), 128.9 (d), 129.1 (d), 129.3 (d), 130.6 (d), 131.9 (d), 132.5 (d), 134.5 (s), 135.5 (s), 135.7 (s), 136.6 (s), 136.7 (s), 136.8 (s), 159.3 (s), 172.2 (s), 173.0 (s), 173.2 (s), 173.4 (s); *m/z* (CI) 576 [(MH)+, 40%], 340 (100%).

*N*-Benzyl-4-hydroxy-*N*-(2-iodo-4-methoxyphenyl)-2-phenylsulfanylmethylbutyr-

amide 20.

Diisobutylaluminum hydride [7.26 cm-3, 7.26 mmol, 2.10 equiv, (1M in toluene)] was added dropwise to a solution of *N*-benzyl-*N*-(2-iodo-4-methoxyphenyl)-3-phenylsulfanylmethylsuccinamic acid methyl ester **19** (1.9 g, 3.3 mmol, 1.00 equiv.) in dry toluene (35 cm-3) at -78°C. The mixture was stirred at -78°C for 20 min. The mixture was warmed to 0°C and hydrochloric acid (2M, 20 cm-3) added carefully. The reaction was stirred for a further 15 min and the aqueous layer separated and extracted with diethyl ether. The ether layer was washed with brine and then dried over anhydrous sodium sulfate. Removal of the solvent *in vacuo* followed by column chromatography on silica gel eluting petroleum ether: ethyl acetate 3:1 yielded pure *N-benzyl-4-hydroxy-N-(2-iodo-4-methoxyphenyl)-2-phenylsulfanylmethyl-butyramide* **20** as a colourless oil (0.99 g, 55%); [Found (ES): MH+ 548.0753, C25H27INO3S requires *MH* 548.0756]; **max (film)/cm-1 3429, 3061, 3005, 2937, 1651, 1591, 1488, 1287, 1029; **H 1.98-2.10 (4H, m, 2 x CH2), 2.44-2.49 and 2.69-2.72 (1H, m, CH), 2.58 (1H, bs, OH), 3.02 and 3.14 (1H, m, CH2), 3.30 and 3.52 (1H, m, CH2), 3.80 and 3.91 (3H, s, CH3), 3.92 and 3.94 (1H, d, *J* 14.3, CH2), 5.74 and 5.81 (1H, d, *J* 14.3, CH2), 6.37 and 6.47 (1H, dd, *J* 2.8, 8.7, ArH), 6.65 and 6.67 (1H, d, *J* 8.7, ArH), 7.14-7.30 (10H, m, ArH), 7.36 and 7.39 (1H, d, *J* 2.8, ArH); **C 33.4 (t), 34.0 (t), 35.7 (t), 36.6 (t), 39.5 (d), 39.6 (d), 52.2 (t), 52.3 (t), 55.7 (q), 55.8 (q), 60.2 (t), 60.6 (t), 99.7 (s), 100.0 (s), 114.3 (d), 114.4 (d), 125.2 (d), 125.5 (d), 126.0 (d), 126.5 (d), 127.7 (d), 127.8 (d), 128.5 (d), 128.6 (d), 128.8 (d), 128.9 (d), 129.0 (d), 129.5 (d), 129.6 (d), 130.8 (d), 131.6 (d), 131.7 (d), 135.3 (s), 135.8 (s), 135.9 (s), 136.2 (s), 136.8 (s), 136.9 (s), 159.3 (s), 159.4 (s), 175.1 (s), 175.2 (s); *m/z* (CI) 548 ([M+H]+, 25%), 312 (100%).

*4-[Benzyl-(2-iodo-4-methoxyphenyl)amino]-3-phenylsulfanylmethylbutan-1-ol* **21** (176 mg, 10%) was also isolated from this chromatography column as a colourless oil; [Found: (ES) MH+ 534.0965, C25H29INO2S requires *MH* 534.0964]; **max (film)/cm-1 3401, 3061, 3004, 2932, 2834, 1593, 1484, 1283, 1037; **H 1.66-1.73 (3H, m, OH and CH2), 1.84 (1H, m, CH), 2.92 (2H, m, CH2), 2.98 (1H, dd, *J* 7.2, 12.8, CH2), 3.18 (1H, dd, *J* 5.3, 12.9, CH2), 3.61 (2H, t, *J* 6.4, CH2), 3.79 (3H, s, CH3), 3.94 (1H, d, *J* 13.9, CH2), 3.99 (1H, d, *J* 13.9, CH2), 6.81 (1H, dd, *J* 2.8, 8.8, ArH), 6.91 (1H, d, *J* 8.8, ArH), 7.13-7.34 (10H, m, ArH), 7.46 (1H, d, *J* 2.8, ArH); **C 33.5 (d), 34.9 (t), 37.2 (t), 55.4 (t), 55.7 (q), 60.9 (t), 61.8 (t), 101.1 (s), 114.8 (d), 124.7 (d), 124.9 (d), 125.8 (d), 127.5 (d), 128.2 (d), 128.9 (d), 129.2 (d), 129.7 (d), 136.9 (s), 137.3 (s), 144.4 (s), 157.0 (s); *m/z* (CI) 534 [(M+H)+, 80%], 298 (100).

###### *N*-Benzyl-2-(2-hydroxyethyl)-*N*-(2-iodo-4-methoxyphenyl)acrylamide 16a

*N*-Benzyl-4-hydroxy-*N*-(2-iodo-4-methoxyphenyl)-2-phenylsulfanylmethylbutyramide **20** (0.5 g, 0.91 mmol, 1.00 equiv.) was dissolved in DCM (15 cm-3), cooled to 0ºC and a solution of *m*-CPBA (0.19 g, 1.10 mmol, 1.20 equiv.) in DCM (5 cm-3) was added. The reaction mixture was stirred at 0ºC for 45 min. This was diluted with DCM, washed with aq. NaHCO3, water, brine, dried and concentrated *in vacuo*. The crude material was dissolved in toluene (90 cm-3) and refluxed for 72 h, then toluene was evaporated and the reaction mixture was subjected to column chromatography eluting with petroleum ether: ethyl acetate 1:1 to afford *N-benzyl-2-(2-hydroxyethyl)-N-(2-iodo-4-methoxyphenyl)acrylamide* **16a** as a colourless oil (286 mg, 72%); [Found (ES): MH+ 438.0563, C19H21INO3 requires *MH* 438.0566]; **max (film)/cm-1 3409, 2938, 1614, 1487, 1287, 1030; **H 2.01 (1H, bs, OH), 2.25-2.31 (1H, m, CH2), 2.48-2.54 (1H, m, CH2), 3.62-3.77 (5H, m, CH2 and CH3), 4.10 (1H, d, *J* 14.1, CH2), 5.10 (1H, s, CH2), 5.14 (1H, s, CH2), 5.71 (1H, d, *J* 14.1, CH2), 6.56 (1H, d, *J* 8.7, ArH), 6.68 (1H, dd, *J* 2.7, 8.7, ArH), 7.21-7.39 (5H, m, ArH), 7.40 (1H, d, *J* 2.7, ArH); **C 38.2 (t), 52.4 (t), 55.7 (q), 62.6 (t), 100.1 (s), 114.4 (d), 120.2 (t), 125.0 (d), 127.9 (d), 128.6 (d), 129.6 (d), 131.6 (d), 136.6 (s), 137.1 (s), 142.0 (s), 159.1 (s), 172.2 (s); *m/z* (EI) 438.1 [(MH)+, 100%].
